# Supplementary material for: Snow Ensemble Uncertainty Project (SEUP): quantification of snow water equivalent uncertainty across North America via ensemble land surface modeling
Source: Copernicus journal article supplement (doi:10.5194/tc-15-771-2021), 2021-02-17
Supplement: Supplementary file 1 [file tc-15-771-2021-supplement.pdf]

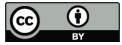

*Supplement of*

**Snow Ensemble Uncertainty Project (SEUP): quantification of snow water equivalent uncertainty across North America via ensemble land surface modeling**

**Rhae Sung Kim et al.**

*Correspondence to:* Rhae Sung Kim ([rhaesung.kim@nasa.gov](mailto:rhaesung.kim@nasa.gov))

The copyright of individual parts of the supplement might differ from the article licence.

## Contents of this file

Text S1 to S2, Tables S1 to S4, Figure S1.

### Introduction

5 The following supplemental information provides additional detail on the SEUP ensemble, which is comprised of 12 ensemble members, created by the combination of four different land surface models (LSMs, Text S1) and three different forcing datasets (Text S2).

### Text S1 Land Surface Models (LSMs)

#### S1.1 Noah version 2.7.1 (Noah2.7.1)

10 Noah2.7.1 (Chen et al., 1996; Ek et al., 2003; Koren et al., 1999) is a LSM that has evolved through community efforts to simulate land surface temperature, snow depth, SWE, canopy water content, surface energy fluxes, water balance, soil temperature, and soil moisture based on the Oregon State University LSM (Mahrt and Pan, 1984). The Noah model has been widely used in operational and research applications. For example, the Noah model has been adopted as the regional and global operational numerical weather prediction model at the NCEP and the 557<sup>th</sup> Weather Wing of the U.S. Air Force (formerly the Air Force Weather Agency). It also has been extensively evaluated in both the off-line mode (e.g., Chen et al., 1996; Mitchell  
15 et al., 2004) and the coupled mode (e.g., Chen et al., 1997; Ek et al., 2003). More detailed descriptions of the Noah physics and development are presented by Ek et al., (2003) and Koren et al. (1999). This study employs the Noah version 2.7.1, which has a single canopy, and a single snow layer. The one-layer snow physical model simulates SWE as the residual of snowfall minus the sum of snowmelt and sublimation. Snowfall occurs whenever there is nonzero precipitation and the near surface air temperature is less than 0°C. Snow melting occurs when the temperature for canopy, ground, and snow is greater than the  
20 freezing point of water when SWE is greater than zero. Refreezing occurs when the layer temperature is less than the freezing point, and the liquid water content is greater than zero. Snow albedo representation uses a parameter -- maximum snow albedo -- which is the upper bound of the fraction of reflected incoming shortwave radiation for deep snowpacks. Within Noah2.7.1, the maximum snow albedo can vary spatially but is temporally constant at given locations; these values were derived from Defense Meteorological Satellite Program (DMSP) imagery (Robinson and Kukla, 1985).

#### 25 S1.2 Noah-MP version 3.6 (Noah-MP3.6)

The Noah-MP3.6 LSM (Niu et al., 2011) is built upon the legacy of the Noah model, but with new and multiple options for selected processes. Most notably, Noah-MP3.6 performs separate energy budget calculations for the bare and vegetated portions of the grid cell; shortwave radiation is computed over the entire grid considering canopy gap probabilities, but longwave radiation, latent heat, sensible heat, and ground heat fluxes are computed separately over the vegetated area and bare  
30 ground. Noah-MP3.6 includes a four-layer soil model and up to three layers for snow, depending on snow depth. The revised

snow scheme allows for snow compaction from the weight of overlying layers and melt metamorphism. Snow cover fraction is computed as a function of snow depth, ground roughness length, and snow density (Niu & Yang, 2007). Noah-MP3.6 has two options for calculating snow surface albedo: the Biosphere-Atmosphere Transfer Scheme (BATS; (Yang et al., 1997) and a Canadian Land Surface Scheme (CLASS; (Verseghy, 1991). CLASS is used here, which computes snow albedo based on the albedo of fresh snow and the age of the snow. For partitioning between rain and snow, Noah-MP3.6 has three options. Two options are simple comparisons of air temperature versus the freezing temperature ( $T_{\text{air}} < T_{\text{frz}} + 2.2 \text{ K}$  and  $T_{\text{air}} < T_{\text{frz}}$ ). The third option uses a function based on air temperature where the fraction of snow decreases between 1° and 2°C (Jordan, 1991), which is used in this study. Niu et al. (2011) performed offline comparisons for Noah and Noah-MP3.6 for two separate field sites and showed that Noah-MP3.6 improves the simulation of SWE, snow depth, density, and snow skin temperature. Compared with Noah, Noah-MP3.6, allows for the retention of meltwater within the snowpack and the refreezing of melt water, which improves the simulation of snow evolution during the melting season.

### **S1.3 Catchment LSM version Fortuna 2.5 (CLSM-F2.5)**

The Catchment version used in this study is the Fortuna 2.5 version used in the Modern-Era Retrospective Analysis for Research and Applications (MERRA) with improved land surface variables (MERRA-Land; Reichle et al., 2011). The Catchment LSM (CLSM) shares the model development legacy with the Mosaic LSM (Koster and Suarez, 1996), which has been enhanced by adding a shallow groundwater module and by using a catchment-based approach (Koster et al., 2000). The basic computational unit of CLSM-F2.5 is the hydrological catchment (a.k.a., watershed) rather than a uniform latitude-longitude grid cell. It uses hydrological catchments as tiles with boundaries defined by topography. Each catchment is separated into three distinct and dynamically varying subareas: a saturated region, an unsaturated region, and a wilting region, which allows the sub-grid scale simulation of differing energy and water budget partitioning based on the moisture state. For ease of model intercomparison, however, the CLSM-F2.5 is used on a regular latitude-longitude grid in this study.

CLSM-F2.5 includes a three-layer snowpack model that incorporates snow physics including densification, snowmelt, refreeze, and snow insulating properties (Lynch-Stieglitz, 1994). The prognostic state variables for each of the three layers include SWE, snow cold content, and snow depth. The model uses an important parameter,  $SWE_{\text{min}}$ , which describes the minimum SWE that must be present per unit surface area before the model considers the surface to be snow covered. In the SEUP runs,  $SWE_{\text{min}}$  is set to  $0.013 \text{ kg/m}^2$ . When there is surface melt or when rain falls on existing snow, water can percolate into the lower snow layers, where it may refreeze. Each layer of newly-fallen snow is initially given a density of  $150 \text{ kg-m}^{-3}$ , which increases as the snow ages. Snow surface albedo is treated with different reflectance values for the visible (VIS) and near-infrared (NIR) radiation bands, with reductions in albedo implemented by both vegetation masking and fractional snow cover (Stieglitz et al., 2001).

#### **S1.4 Joint UK Land Environment Simulator (JULES)**

The Joint UK Land Environment Simulator (JULES; Best et al., 2011; Clark et al., 2011) is based on the Met Office Surface Exchange Scheme (MOSES; Cox et al., 1999; Essery et al., 2003). This land surface model has been coupled to an atmospheric global circulation model, as done at the Hadley Center for Climate Prediction and Research (Blyth et al., 2006), or run in stand-  
65 alone mode driven by forcing data. In this study, the multi-layer snow model is set at a maximum of 3-layers. The actual number of layers depends on the snow depth, and not all the layers necessarily exist at any one time. Snow first accumulates until it reaches twice its prescribed thickness in the lowest layer, then splits into 2 layers with the upper part staying fixed in thickness and continuing to accumulate in the lower layer, then splits again. For each layer in the snowpack, snow thickness, density, temperature, grain size, and ice/liquid content are dynamically calculated and these parameters control the heat  
70 capacity and conductance. The density of each layer changes with time, liquid water forms, percolates down, and freezes again, sublimation happens, and the albedo is changed via snow grain size. JULES has two types of snow albedo schemes: the diagnostic albedo scheme and the prognostic albedo scheme. In this study, the diagnostic snow albedo parameterization option is selected (consistent with the operational configuration at the UK Met Office, Parallel Suite 41 (PS41)) which only uses snow depth and cannot represent the impacts of snow aging on the surface albedo. A detailed explanation can be found in Best et al.  
75 (2011).

#### **Text S2 Forcing datasets**

##### **S2.1 Modern-Era Retrospective Analysis for Research and Applications, version 2 (MERRA2)**

The Modern-Era Retrospective Analysis for Research and Applications, version 2 (MERRA2; Gelaro et al., 2017; Molod et al., 2015) is the long-term global reanalysis produced by NASA's Global Modeling and Assimilation Office (GMAO) that  
80 assimilates in situ and satellite observations into a global atmospheric model. It spans the satellite observing era (from 1980 to the present) with a regularly-gridded, homogeneous record of the global atmosphere, and improved land surface representation (i.e., the use of observation-based precipitation to force the land surface). MERRA2 has a native spatial resolution of 0.5° latitude by 0.625° longitude (roughly 50 km) and hourly temporal resolution.

##### **S2.2 Global Data Assimilation System (GDAS)**

The GDAS (Global Data Assimilation System; Derber et al., 1991) is the global, operational atmospheric analysis system based on the operational Global Forecasting Systems (GFS) developed at the Environmental Modeling Center (EMC) of the National Oceanic and Atmospheric Administration (NOAA) / National Centers for Environmental Prediction (NCEP). GDAS  
85 assimilates in situ and satellite observations into an atmospheric model for the purpose of initializing weather forecasts. The GDAS model grids have been upgraded from roughly 80 km (since 2000), ~60 km (Oct. 2002), ~38 km (Jun. 2005), 27 km  
90 (Jul. 2010), to ~13 km (January 2015). The temporal resolution is 3-hour.

### **S2.3 European Centre for Medium-Range Weather Forecasts (ECMWF)**

The European Centre for Medium-Range Weather Forecasts (ECMWF; Molteni et al., 1996) data is obtained from the operational, global analysis products. The model assimilates early in-situ surface observations as well as modern high-resolution satellite datasets. In this study, the operational real-time data from the ECMWF-Integrated Forecast System (IFS) are used; the meteorological fields are provided on a  $0.25^\circ$  grid (roughly 25 km) at a 3-hour interval, and generated by assimilating available atmospheric observations every 12 hours into a forecast model with surface meteorological fields (e.g., precipitation and radiation), which are diagnosed from the model output (Dee et al., 2011; Flemming et al., 2015).

100

105

110

115

120

**Table S1: Configuration of the SEUP model configurations used in this study. Note that all have a 5-km resolution with a 15-minute timestep using forcing from MERRA2, GDAS, and ECMWF. The model domain covers all of North America (24.9° N to 71.9° N and 168.6° W to 51.9° W).**

| LSMs       | # of soil layers | # of snow layers | Dynamic vegetation model | Precipitation Partitioning                                                                                                                                                                                                                                                                                           | Snow albedo Parameterization |   | Snowpack energy balance      |   | Sub-grid scheme                                                                                                  |
|------------|------------------|------------------|--------------------------|----------------------------------------------------------------------------------------------------------------------------------------------------------------------------------------------------------------------------------------------------------------------------------------------------------------------|------------------------------|---|------------------------------|---|------------------------------------------------------------------------------------------------------------------|
|            |                  |                  |                          |                                                                                                                                                                                                                                                                                                                      |                              |   |                              |   |                                                                                                                  |
| Noah 2.7.1 | 4                | 1                | No                       | Snow for $T_{\text{air}} < 0^{\circ}\text{C}$ , rain otherwise                                                                                                                                                                                                                                                       | Age of snow                  |   | Atmospheric skin interaction | √ | N/A                                                                                                              |
|            |                  |                  |                          |                                                                                                                                                                                                                                                                                                                      | Fresh snow albedo            |   | Liquid-water refreezing      | √ |                                                                                                                  |
|            |                  |                  |                          |                                                                                                                                                                                                                                                                                                                      | Fractional snow cover        | √ | Conduction between layers    |   |                                                                                                                  |
|            |                  |                  |                          |                                                                                                                                                                                                                                                                                                                      | Vegetation masking           | √ |                              |   |                                                                                                                  |
| Noah-MP3.6 | 4                | 3                | Yes                      | Jordan's scheme (Jordan, 1991)<br>Snow for $T_{\text{air}} < 0.5^{\circ}\text{C}$ , rain for $T_{\text{air}} > 2.5^{\circ}\text{C}$ ,<br>Snowfall fraction=0.6; $2.0^{\circ}\text{C} < T_{\text{air}} \leq 2.5^{\circ}\text{C}$ ,<br>Linear rain/snow transition:<br>$0.5^{\circ}\text{C} < T_{\text{air}} \leq 2.0$ | Age of snow                  | √ | Atmospheric skin interaction | √ | Semi-tile vegetation and bare soil for the turbulence transfer                                                   |
|            |                  |                  |                          |                                                                                                                                                                                                                                                                                                                      | Fresh snow albedo            | √ | Liquid-water refreezing      | √ |                                                                                                                  |
|            |                  |                  |                          |                                                                                                                                                                                                                                                                                                                      | Fractional snow cover        | √ | Conduction between layers    | √ |                                                                                                                  |
|            |                  |                  |                          |                                                                                                                                                                                                                                                                                                                      | Vegetation masking           | √ |                              |   |                                                                                                                  |
| CLSM F-2.5 | 3                | 3                | No                       | Snow for $T_{\text{air}} < 0^{\circ}\text{C}$ , rain otherwise                                                                                                                                                                                                                                                       | Age of snow                  | √ | Atmospheric skin interaction | √ | Each grid box's soil hydrology is separated into a saturated region, an unsaturated region, and a wilting region |
|            |                  |                  |                          |                                                                                                                                                                                                                                                                                                                      | Fresh snow albedo            | √ | Liquid-water refreezing      | √ |                                                                                                                  |
|            |                  |                  |                          |                                                                                                                                                                                                                                                                                                                      | Fractional snow cover        | √ | Conduction between layers    | √ |                                                                                                                  |
|            |                  |                  |                          |                                                                                                                                                                                                                                                                                                                      | Vegetation masking           | √ |                              |   |                                                                                                                  |
| JULES      | 4                | 1                | No                       | Snow for $T_{\text{air}} < 0^{\circ}\text{C}$ , rain otherwise                                                                                                                                                                                                                                                       | Age of snow                  |   | Atmospheric skin interaction | √ | A separate energy balance is calculated for each surface type                                                    |
|            |                  |                  |                          |                                                                                                                                                                                                                                                                                                                      | Fresh snow albedo            |   | Liquid-water refreezing      | √ |                                                                                                                  |
|            |                  |                  |                          |                                                                                                                                                                                                                                                                                                                      | Fractional snow cover        |   | Conduction between layers    | √ |                                                                                                                  |
|            |                  |                  |                          |                                                                                                                                                                                                                                                                                                                      | Vegetation masking           | √ |                              |   |                                                                                                                  |

130 **Table S2:** Individual mountain range areas based on Wrzesien et al. (2018).

| Mountain range               | Area (km <sup>2</sup> ) |
|------------------------------|-------------------------|
| 1. Alaska                    | 187000                  |
| 2. Appalachian               | 179000                  |
| 3. Brooks                    | 236000                  |
| 4. Cascades                  | 197000                  |
| 5. Coast                     | 242000                  |
| 6. Great Basin               | 207000                  |
| 7. Mackenzie                 | 551000                  |
| 8. Rockies, Canadian         | 656000                  |
| 9. Rockies, USA              | 702000                  |
| 10. Sierra Nevada            | 64000                   |
| 11. Torngat                  | 42000                   |
| 12. Total Mountainous areas  | 3250000                 |
| 13. Total Non-Mountain areas | 15190000                |

135 **Table S3:** Individual snow class range areas based on Liston & Sturm (A global snow classification dataset for Earth-system applications, 2014, unpublished).

| Snow class range | Area (km <sup>2</sup> ) |
|------------------|-------------------------|
| 1. Tundra        | 4640000                 |
| 2. Taiga         | 3070000                 |
| 3. Maritime      | 1640000                 |
| 4. Ephemeral     | 3970000                 |
| 5. Prairie       | 3530000                 |
| 6. Warm forest   | 910000                  |
| 7. Ice           | 50000                   |

| Land cover range | Area (km <sup>2</sup> ) |
|------------------|-------------------------|
| 1. Forested      | 6550000                 |
| 2. Non-forested  | 11920000                |

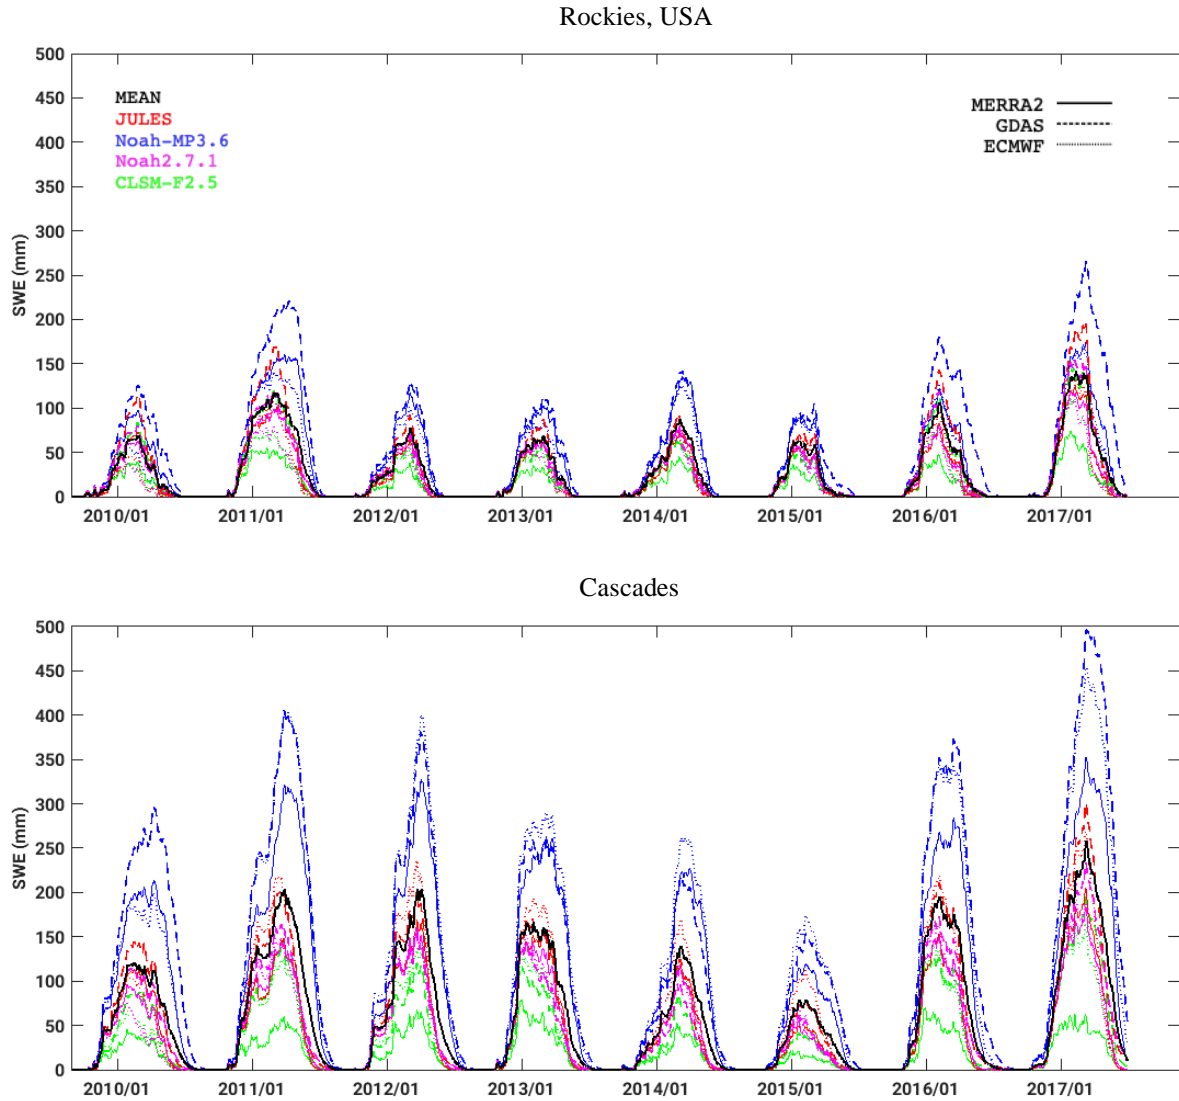

160 **Figure S1:** Time series of domain-averaged mean SWE of Rockies, USA and Cascades. Different colors and line style were used to represent each ensemble; a bold black solid line represents the domain-averaged ensemble mean; the units are mm.



## References

- Best, M. J., Pryor, M., Clark, D. B., Rooney, G. G., Essery, R. L. H., Ménard, C. B., Edwards, J. M., Hendry, M. A., Porson, A., Gedney, N., Mercado, L. M., Sitch, S., Blyth, E., Boucher, O., Cox, P. M., Grimmond, C. S. B. and Harding, R. J.: The  
165 Joint UK Land Environment Simulator (JULES), model description – Part 1: Energy and water fluxes, *Geoscientific Model Development*, 4(3), 677-699, doi:10.5194/gmd-4-677-2011, 2011.
- Blyth, E., Best, M., Cox, P., Essery, R., Boucher, O., Harding, R., Prentice, C., Vidale, P. L. and Woodward, I.: JULES: a new community land surface model, *Global Change NewsLetter*, 66, 9-11, 2006.
- Chen, F., Mitchell, K., Schaake, J., Xue, Y., Pan, H. L., Koren, V., Duan, Q. Y., Ek, M. and Betts, A.: Modeling of land surface  
170 evaporation by four schemes and comparison with FIFE observations, *Journal of Geophysical Research Atmospheres*, 101(D3), 7251-7268, doi:10.1029/95JD02165, 1996.
- Chen, F., Janjić, Z. and Mitchell, K.: Impact of atmospheric surface-layer parameterizations in the new land-surface scheme of the NCEP mesoscale Eta model, *Boundary-Layer Meteorology*, 85(3), 349-421, doi:10.1023/A:1000531001463, 1997.
- Clark, D. B., Mercado, L. M., Sitch, S., Jones, C. D., Gedney, N., Best, M. J., Pryor, M., Rooney, G. G., Essery, R. L. H.,  
175 Blyth, E., Boucher, O., Harding, R. J., Huntingford, C. and Cox, P. M.: The Joint UK Land Environment Simulator (JULES), model description – Part 2: Carbon fluxes and vegetation dynamics, *Geoscientific Model Development*, 4(3), 701-722, doi:10.5194/gmd-4-701-2011, 2011.
- Cox, P. M., Betts, R. A., Bunton, C. B., Essery, R. L. H., Rowntree, P. R. and Smith, J.: The impact of new land surface physics on the GCM simulation of climate and climate sensitivity, *Climate Dynamics*, 15(3), 183-203, doi:10.1007/s003820050276,  
180 1999.
- Dee, D. P., Uppala, S. M., Simmons, A. J., Berrisford, P., Poli, P., Kobayashi, S., Andrae, U., Balmaseda, M. A., Balsamo, G., Bauer, P., Bechtold, P., Beljaars, A. C. M., van de Berg, L., Bidlot, J., Bormann, N., Delsol, C., Dragani, R., Fuentes, M., Geer, A. J., Haimberger, L., Healy, S. B., Hersbach, H., Hólm, E. V., Isaksen, L., Kållberg, P., Köhler, M., Matricardi, M., McNally, A. P., Monge-Sanz, B. M., Morcrette, J. J., Park, B. K., Peubey, C., de Rosnay, P., Tavolato, C., Thépaut, J. N. and  
185 Vitart, F.: The ERA-Interim reanalysis: Configuration and performance of the data assimilation system, *Quarterly Journal of the Royal Meteorological Society*, 137(656), 553-597, doi:10.1002/qj.828, 2011.
- Derber, J. C., Parrish, D. F. and Lord, S. J.: The new global operational analysis system at the national-meteorological-center, *Weather and Forecasting*, 6(4), 538-547, doi:10.1175/1520-0434(1991)006<0538:tngoas>2.0.co;2, 1991.
- Ek, M. B., Mitchell, K. and Y. Lin: Implementation of Noah land surface model advances in the National Centers for  
190 Environmental Prediction operational mesoscale Eta model, *Journal of Geophysical Research*, 108(D22), doi:10.1029/2002JD003296, 2003.
- Essery, R. L. H., Best, M. J., Betts, R. A., Cox, P. M. and Taylor, C. M.: Explicit Representation of Subgrid Heterogeneity in a GCM Land Surface Scheme, *Journal of Hydrometeorology*, 4(3), 530-543, doi:10.1175/1525-7541(2003)004<0530:EROSHI>2.0.CO;2, 2003.

- 195 Flemming, J., Huijnen, V., Arteta, J., Bechtold, P., Beljaars, A., Blechschmidt, A. M., Diamantakis, M., Engelen, R. J., Gaudel, A., Inness, A., Jones, L., Josse, B., Katragkou, E., Marecal, V., Peuch, V. H., Richter, A., Schultz, M. G., Stein, O. and Tsikerdekis, A.: Tropospheric chemistry in the integrated forecasting system of ECMWF, *Geoscientific Model Development*, 8(4), 975-1003, doi:10.5194/gmd-8-975-2015, 2015.
- Gelaro, R., McCarty, W., Suárez, M. J., Todling, R., Molod, A., Takacs, L., Randles, C. A., Darmenov, A., Bosilovich, M. G.,  
200 Reichle, R., Wargan, K., Coy, L., Cullather, R., Draper, C., Akella, S., Buchard, V., Conaty, A., da Silva, A. M., Gu, W., Kim, G. K., Koster, R., Lucchesi, R., Merkova, D., Nielsen, J. E., Partyka, G., Pawson, S., Putman, W., Rienecker, M., Schubert, S. D., Sienkiewicz, M. and Zhao, B.: The modern-era retrospective analysis for research and applications, version 2 (MERRA-2), *Journal of Climate*, 30(14), 5419-5454, doi:10.1175/JCLI-D-16-0758.1, 2017.
- Jordan, R.: A One-Dimensional Temperature Model for a Snow Cover: Technical Documentation for SNTHERM.89., Tech.  
205 Rep. Special Report 91-16, U.S. Army Cold Regions Research and Engineering Laboratory, 1991.
- Koren, V., Schaake, J., Mitchell, K., Duan, Q. Y., Chen, F. and Baker, J. M.: A parameterization of snowpack and frozen ground intended for NCEP weather and climate models, *Journal of Geophysical Research Atmospheres*, 104(D16), 19569-19585, doi:10.1029/1999JD900232, 1999.
- Koster, R. D. and Suarez, M. J.: Energy and Water Balance Calculations in the Mosaic LSM, NASA Tech. Memo. 104606,  
210 9(76), 1996.
- Koster, R. D., Suarez, M. J., Ducharme, A., Stieglitz, M. and Kumar, P.: A catchment-based approach to modeling land surface processes in a general circulation model 1. Model structure, *Journal of Geophysical Research Atmospheres*, 105(D20), 24809-24822, doi:10.1029/2000JD900327, 2000.
- Lynch-Stieglitz, M.: The development and validation of a simple snow model for the GISS GCM, *Journal of Climate*, 7(12),  
215 1842-1855, doi:10.1175/1520-0442(1994)007<1842:TDAVOA>2.0.CO;2, 1994.
- Mahrt, L. and Pan, H.: A two-layer model of soil hydrology, *Boundary-Layer Meteorology*, 29(1), 1-20, doi:10.1007/BF00119116, 1984.
- Mitchell, K. E., Lohmann, D., Houser, P. R. and Wood, E. F.: The multi-institution North American Land Data Assimilation System (NLDAS): Utilizing multiple GCIP products and partners in a continental distributed hydrological modeling system,  
220 *Journal of Geophysical Research*, 109(D7), doi:10.1029/2003JD003823, 2004.
- Molod, A., Takacs, L., Suarez, M. and Bacmeister, J.: Development of the GEOS-5 atmospheric general circulation model: Evolution from MERRA to MERRA2, *Geoscientific Model Development*, 8(5), 1339-1356, doi:10.5194/gmd-8-1339-2015, 2015.
- Molteni, F., Buizza, R., Palmer, T. N. and Petroliagis, T.: The ECMWF ensemble prediction system: Methodology and  
225 validation, *Quarterly Journal of the Royal Meteorological Society*, 122(529), 73-119, doi:10.1256/smsqj.52904, 1996.
- Niu, G.-Y., Yang, Z.-L., Mitchell, K. E., Chen, F., Ek, M. B., Barlage, M., Kumar, A., Manning, K., Niyogi, D., Rosero, E., Tewari, M. and Xia, Y.: The community Noah land surface model with multiparameterization options (Noah-MP): 1. Model description and evaluation with local-scale measurements, *Journal of Geophysical Research: Atmospheres*, 116(D12),

- D12109, doi:10.1029/2010JD015139, 2011.
- 230 Niu, G. Y. and Yang, Z. L.: An observation-based formulation of snow cover fraction and its evaluation over large North American river basins, *Journal of Geophysical Research Atmospheres*, 112(D21), doi:10.1029/2007JD008674, 2007.
- Reichle, R. H., Koster, R. D., De Lannoy, G. J. M., Forman, B. A., Liu, Q., Mahanama, S. P. P. and Toure, A.: Assessment and enhancement of MERRA land surface hydrology estimates, *Journal of Climate*, 24(24), 6322-6338, doi:10.1175/JCLI-D-10-05033.1, 2011.
- 235 Robinson, D. A. and Kukla, G.: Maximum Surface Albedo of Seasonally Snow-Covered Lands in the Northern Hemisphere, *Journal of Climate and Applied Meteorology*, 24(5), 402-411, doi:10.1175/1520-0450(1985)024<0402:MSAOSS>2.0.CO;2, 1985.
- Stieglitz, M., Ducharme, A., Koster, R. and Suarez, M.: The impact of detailed snow physics on the simulation of snow cover and subsurface thermodynamics at continental scales, *Journal of Hydrometeorology*, 2(3), 228-242, doi:10.1175/1525-240 7541(2001)002<0228:TIODSP>2.0.CO;2, 2001.
- Verseghy, D. L.: Class—A Canadian land surface scheme for GCMS. I. Soil model, *International Journal of Climatology*, 11(2), 111-133, doi:10.1002/joc.3370110202, 1991.
- Wrzesien, M. L., Durand, M. T., Pavelsky, T. M., Kapnick, S. B., Zhang, Y., Guo, J. and Shum, C. K.: A new estimate of North American mountain snow accumulation from regional climate model simulations, *Geophysical Research Letters*, 45(3), 245 1423–1432, doi.org/10.1002/2017GL076664, 2018.
- Yang, Z. L., Dickinson, R. E., Robock, A. and Vinnikov, K. Y.: Validation of the snow submodel of the biosphere-atmosphere transfer scheme with Russian snow cover and meteorological observational data, *Journal of Climate*, 10(2), 353-373, doi:10.1175/1520-0442(1997)010<0353:VOTSSO>2.0.CO;2, 1997.
